# Supplementary material for: The Novel Nucleoside Analogue ProTide NUC-7738 Overcomes Cancer Resistance Mechanisms In Vitro and in a First-In-Human Phase I Clinical Trial
Source: PubMed Central journal article supplement (PMC9401491; doi:10.1158/1078-0432.ccr-21-1652), 2021-12-01

# Figure S5

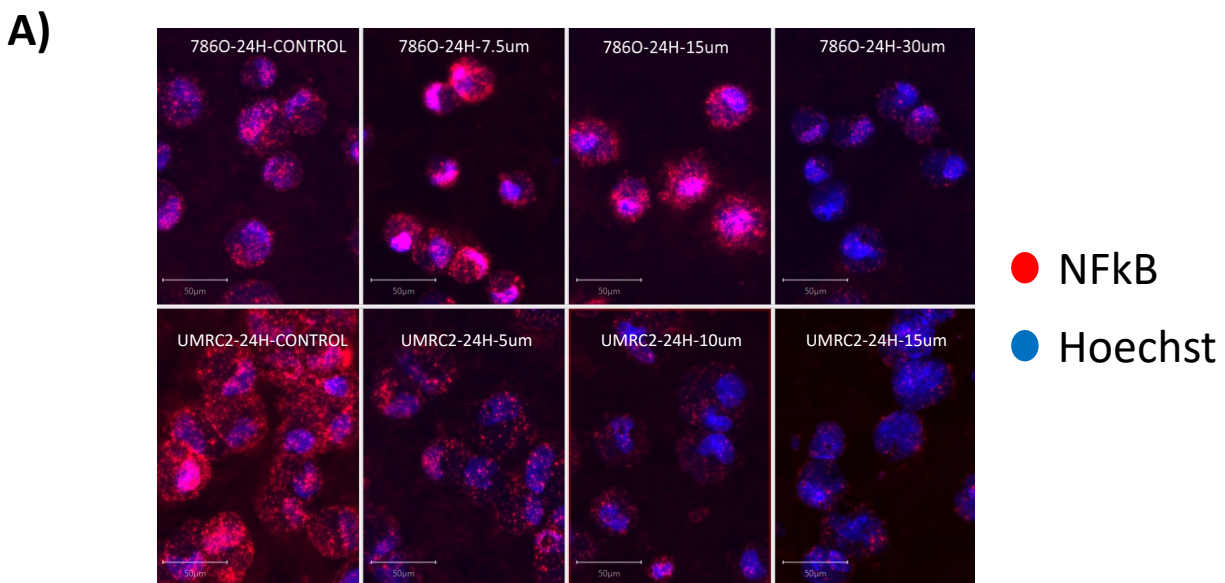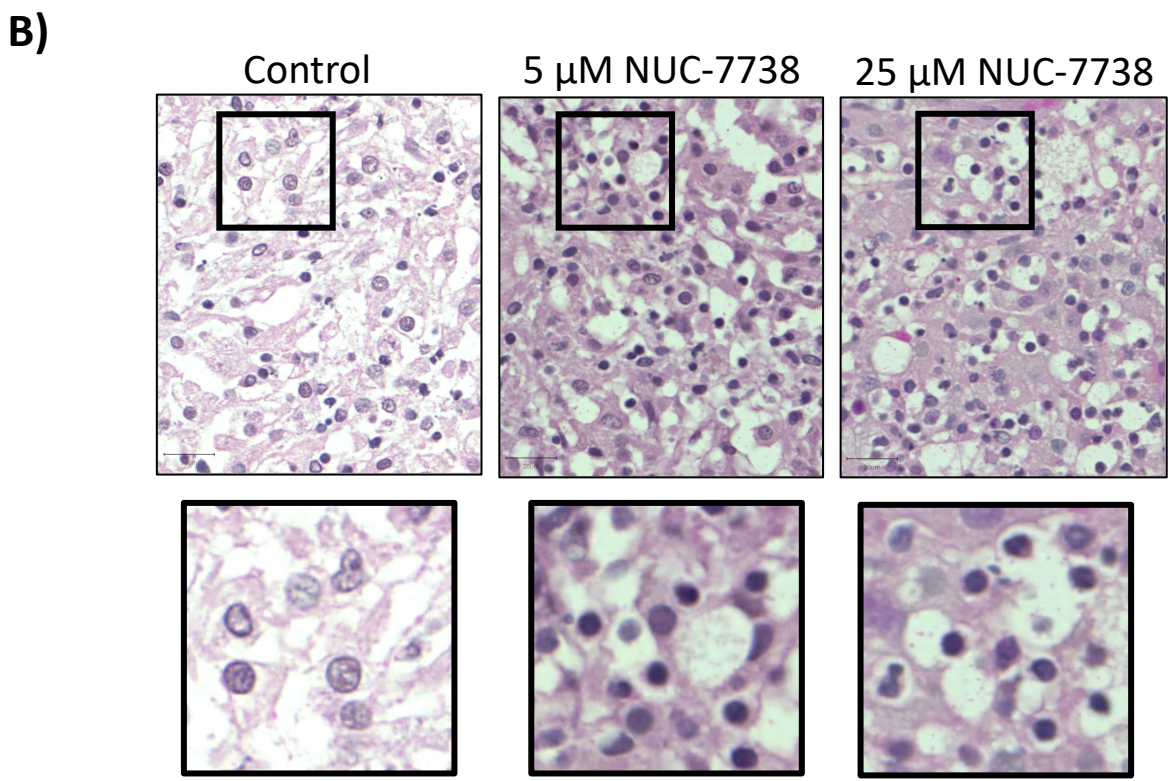

Supplement: 10780432ccr211652-sup-265190_3_supp_7351757_qyskvs.pdf [file 10780432ccr211652-sup-265190_3_supp_7351757_qyskvs.pdf]
