# Supplementary material for: The Novel Nucleoside Analogue ProTide NUC-7738 Overcomes Cancer Resistance Mechanisms In Vitro and in a First-In-Human Phase I Clinical Trial
Source: PubMed Central journal article supplement (PMC9401491; doi:10.1158/1078-0432.ccr-21-1652), 2021-12-01

# Figure S1

**A)**

|                          | <b>Unique Insertions</b> | <b>Significant Hits</b> |
|--------------------------|--------------------------|-------------------------|
| <b>CONTROL</b>           | 1 772 616                | ~16 200                 |
| <b>3'-dA (375µM)</b>     | 116 750                  | 106                     |
| <b>NUC-7738 (50 µM)</b>  | 809 901                  | 121                     |
| <b>NUC-7738 (100 µM)</b> | 326 843                  | 295                     |
| <b>NUC-7738 (125 µM)</b> | 5 160                    | 27                      |

**B)**

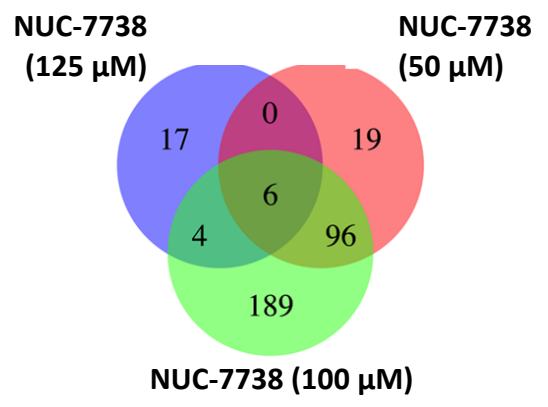

Supplement: 10780432ccr211652-sup-265190_3_supp_7351767_qyckvc.pdf [file 10780432ccr211652-sup-265190_3_supp_7351767_qyckvc.pdf]
